# Supplementary material for: The SARS-CoV-2 Spike Protein Activates the Epidermal Growth Factor Receptor-Mediated Signaling
Source: MDPI journal article supplement (doi:10.3390/vaccines11040768), 2023-03-30
Supplement: s1 [file s1]

## Supplementary materials

# The SARS-CoV-2 Spike Protein Activates the Epidermal Growth Factor Receptor-Mediated Signaling

Abdulrasheed Palakkott<sup>1, #</sup>, Aysha Alneyadi<sup>1, #</sup>, Khalid Muhammad<sup>1</sup>, Ali H. Eid<sup>3</sup>, Khaled, Amiri<sup>1,2</sup>, Mohammed Akli Ayoub<sup>1, q, \*</sup> and Rabah Iratni<sup>1, \*</sup>

<sup>1</sup>Department of Biology, College of Science, United Arab Emirates University, Al Ain PO Box 15551, UAE.

<sup>2</sup>Khalifa Center for Biotechnology and Genetic Engineering, United Arab Emirates University, Al Ain PO Box 15551, UAE.

<sup>3</sup>Department of Basic Medical Sciences, College of Medicine, QU Health, Qatar University, Doha, Qatar

<sup>#</sup> The authors contributed equally to the work.

<sup>q</sup>Present address: Biology Department, College of Arts and Sciences, Khalifa University, P O Box 127788, Abu Dhabi, UAE

\* Correspondence: Rabah Iratni (R\_iratni@uaeu.ac.ae), Mohammed Akli Ayoub ([mohammed.ayoub@ku.ac.ae](mailto:mohammed.ayoub@ku.ac.ae))

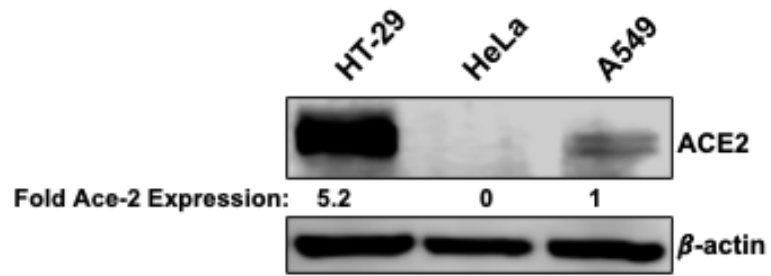

Figure S1. Analysis of the expression of the endogenous ACE2 in cancer cell lines. A549, HT-29, and HeLa cells were used for the endogenous expression of ACE2 using SDS-PAGE followed by western blot using anti-ACE2 antibody.

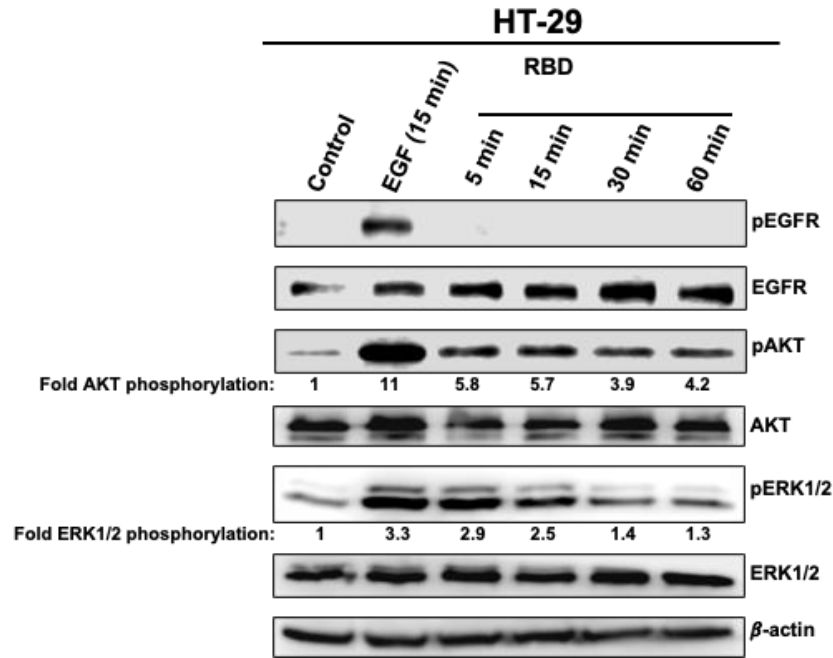

*Figure S2. Time-course accumulation of pEGFR, pAKT, and pERK1/2 in RBD-treated HT-29 cells.* HT-29 cells were treated or not with 5  $\mu$ g/mL RBD protein for the indicated time points (5, 15, 30 and 60 min), and the protein levels of pEGFR, pAKT and pERK1/2, and their respective total levels were determined by western blot. As a positive control, the treatment with EGF (5  $\mu$ g/mL) was carried out for 15 min.
